# Supplementary material
Source: PubMed Central journal article supplement (PMC3418673)

## Supplementary Material

### Modulation of the Active Site Conformation by Site-directed Mutagenesis in Cytochrome *c* Oxidase from *Paracoccus denitrificans*

Hong Ji<sup>a</sup>, Tapan Das<sup>a</sup>, Anne Puustinin<sup>b</sup>, Mårten Wikström<sup>b</sup>, Syun-Ru Yeh<sup>a</sup> and Denis L. Rousseau<sup>a</sup>

a. Albert Einstein College of Medicine, Department of Physiology and Biophysics, Bronx, NY 10461

b. University of Helsinki, Department of Medical Chemistry, Institute of Biomedical Sciences and Biocentrum Helsinki, Helsinki, Finland

Supplemental Figures.

Figure S1 A and B. Resonance Raman spectra of the CO-bound adducts of mutants of fully reduced *Paracoccus denitrificans* CcO obtained with 413.1 nm excitation.

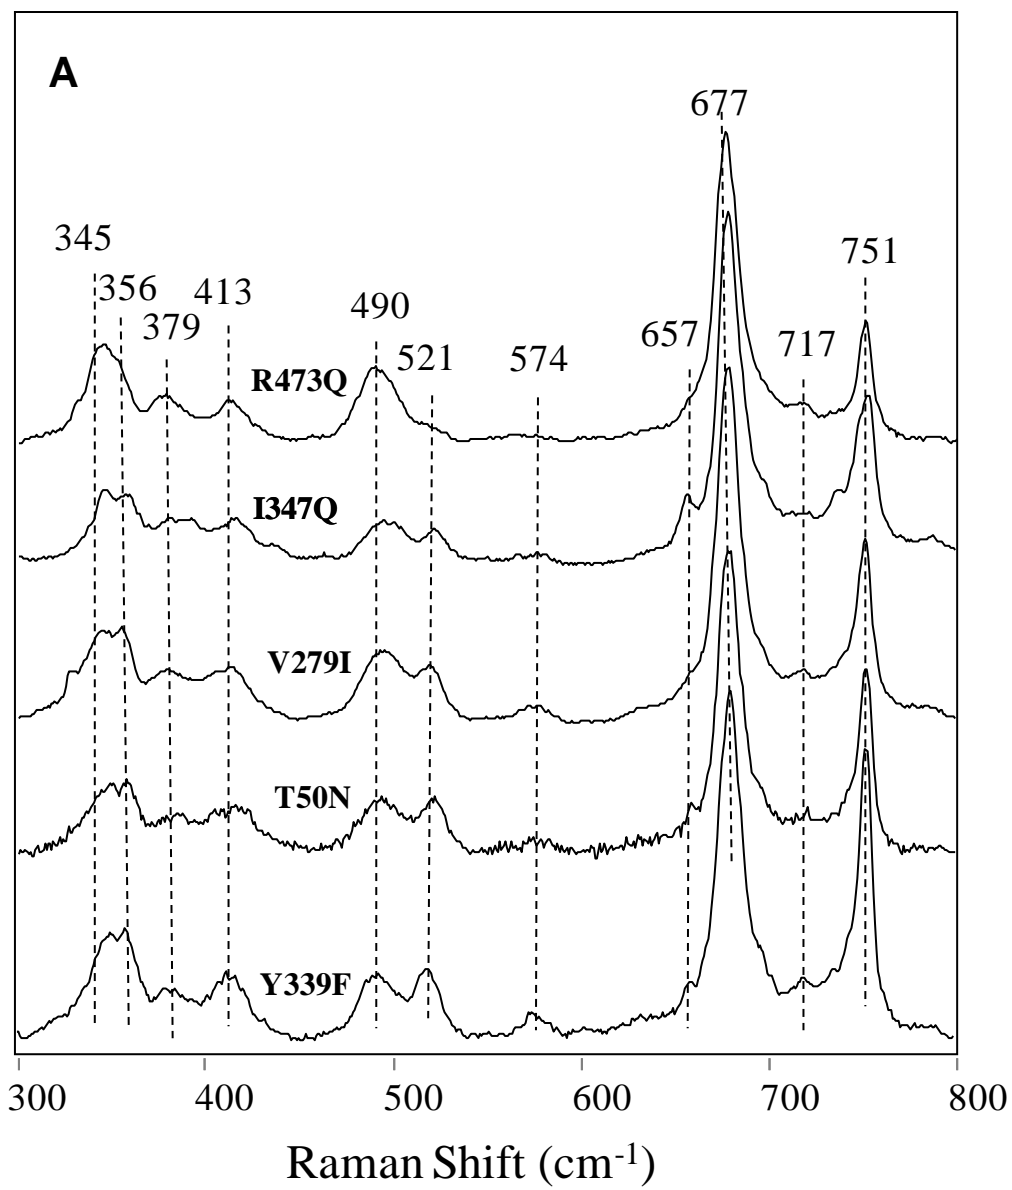

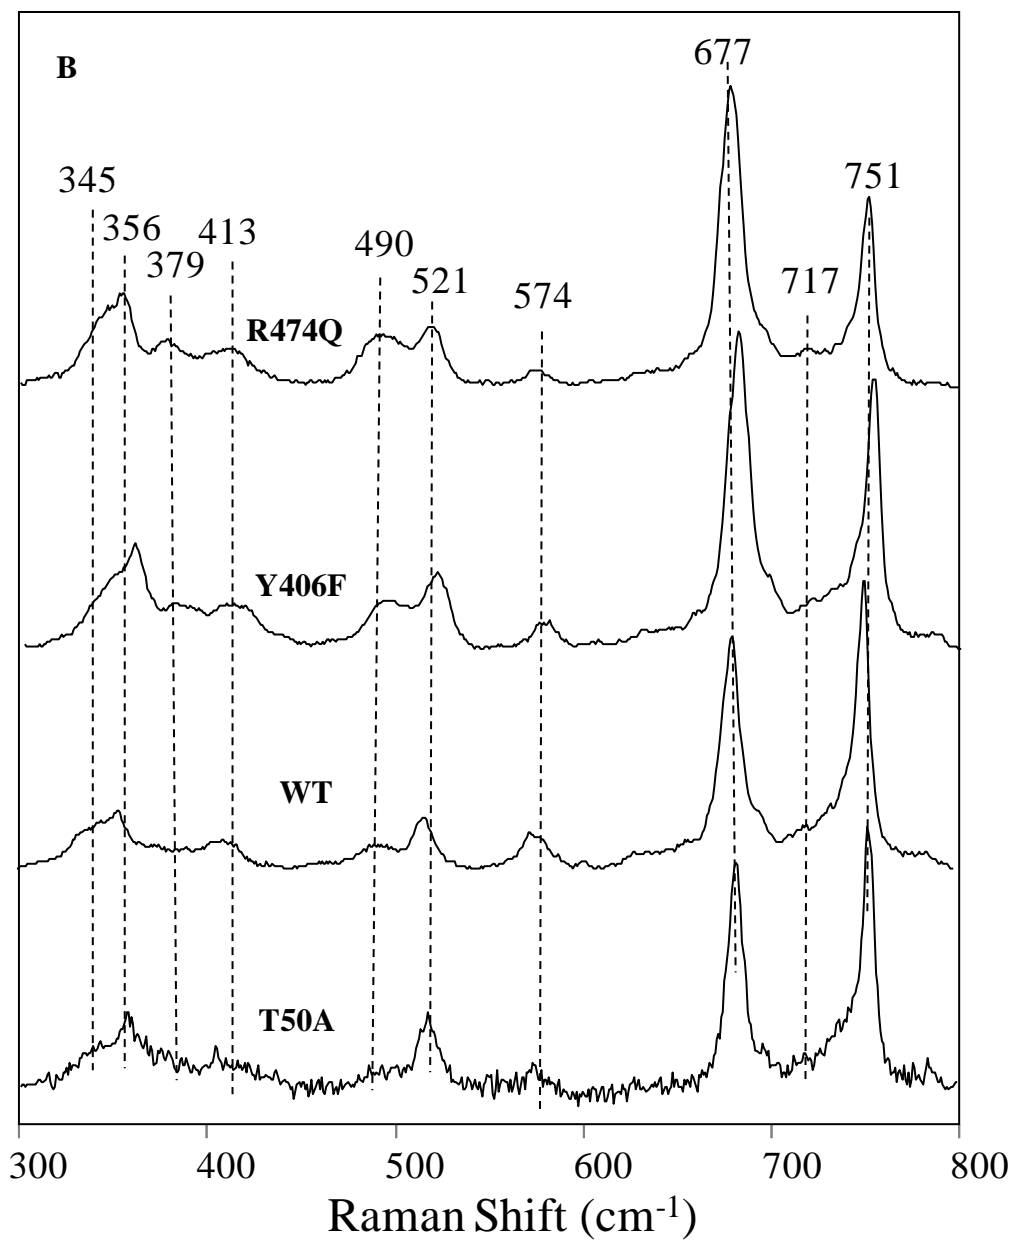

Supplement: NIHMS162838-supplement-01.pdf [file NIHMS162838-supplement-01.pdf]
